# Supplementary material for: A review and upgrade of the Lithospheric dynamics in context of the Seismo-electromagnetic Theory
Source: Copernicus journal article supplement (doi:10.5194/nhess-2019-22), 2019-02-18
Supplement: Supplementary file [file nhess-2019-22-AC3-supplement.pdf]

# A review and upgrade of the Lithospheric dynamics in context of the Seismo-electromagnetic Theory

Patricio Venegas-Aravena (1, 2, 3), Enrique G. Cordaro (1, 4), David Laroze (5).

(1) Cosmic Radiation Observatories, University of Chile, Casilla 487-3, Santiago, Chile

(2) Departamento de Geofísica, Universidad de Chile, Blanco Encalada 2002, Santiago, Chile.

(3) Department of Structural and Geotechnical Engineering, School of Engineering, Pontificia Universidad Católica de Chile, Vicuña Mackenna 4860, Macul, Santiago, Chile.

(4) Facultad de Ingeniería, Universidad Autónoma de Chile, Pedro de Valdivia 425, Santiago, Chile.

(5) Instituto de Alta Investigación, CEDENNA, Universidad de Tarapacá, Casilla 7D, Arica, Chile.

Author : P. Venegas-Aravena: patricio.venegas@ing.uchile.cl

Co-author: E. G. Cordaro: ecordaro@dfi.uchile.cl

Co-author: D. Laroze: dlarozen@uta.cl

## Abstract

This publication highlights theoretical work that could explain five different empirical observations indicating a direct relationship between magnetic fields and earthquakes, which would allow the description of a causal mechanism prior to and during the occurrence of earthquakes. These theoretical calculations seek to elucidate the role of the magnetic field in different aspects of solid earth dynamics, with an interest in the study and comprehension of the physics that could generate earthquakes accompanied by simultaneous magnetic signals within the lithosphere. The Motion of Charged Edge Dislocations (MCD) model and its correlation with the magnetic field have been used in order to include the generation of electric currents. The electric currents resulting from stress variation in the lithosphere helps us to analyze the lithosphere as a critical system, before and after the occurrence of earthquakes, by using the concept of earthquake entropy. Where it is found that the non-existence of seismic and magnetic precursors could be interpreted as a violation to the second law of thermodynamics. In addition, the Seismic Moment and the Moment Magnitude of some great earthquakes are quite accurately calculated using the co-seismic magnetic field. The distance-dependent co-seismic magnetic field has been theorized for some of the largest recorded earthquakes. The frequency of oscillation of the Earth's magnetic field that could be associated with earthquakes is calculated and being consistent to the ultra-low frequency (ULF) signals that some authors propose in the so-called "LAIC Effect" (lithosphere-atmosphere-ionosphere coupling). Finally, the location and dimensions of the micro cracks that explain some anomalous magnetic measurements are shown.

Keywords: Seismo-electromagnetic Theory, LAIC Effect, Magnetism, Earthquakes.

## 1 Introduction

A number of investigations attempting to relate the magnetic field to seismic events have emerged over the past few years, (e.g. Park, 1996; Surkov et al., 2003; Johnston et al., 2006; Balasis and Mandaia 2007; Sgrigna et al., 2007; Saradjian and Akhoondzadeh, 2011; Varotsos et al., 2011; De Santis 2014; Donner et al., 2015; Schekotov and Hayakawa, 2015; Daneshvar and Freund, 2017; De Santis et al., 2017; Cordaro et al., 2018, 2019; Marchetti and Akhoondzadeh, 2018; Pulinets et al., 2018; among others). However, there is still no unified causal mechanism that is widely accepted and that may account for the physics of all these observations prior to or during the occurrence of an earthquake (Hough, 2010), although the laboratory evidence shows the possibility of an increase in the conductivity of rocks when subjected to stress changes,

1 either through microcracks or chemical imperfections (Freund, 2003; Anastasiadis et al., 2004; Cartwright-  
2 Taylor et al., 2014). Therefore, this paper will attempt to explain the physics of magnetic observations  
3 recorded by different researchers accurately, organizing them in five categories:  
4

5 1.- Since the lithosphere can be considered a non-equilibrium system (De Santis et al., 2011), it is necessary  
6 to study **any change** in stress on rocks. The generation of current and magnetic field resulting from stress  
7 changes in rocks and their relationship with earthquakes has been shown empirically and theoretically by  
8 Vallianatos and Tzanis (2003), Anastasiadis et al. (2004), Scoville et al. (2015), among others. This  
9 information is relevant, as any mechanism to be related to earthquakes should provide some connection with  
10 stress changes in the lithosphere. Many explanations have been offered about the generation of currents  
11 through stress changes in rocks, including the piezoelectric effect (Tuck et al., 1977), the presence of fluids  
12 in rocks through the so-called electrokinetic effect (Morgan et al., 1989) or chemical processes in rocks  
13 (Paudel et al., 2018). However, the generation of transient currents occurs in rocks either with or without  
14 the presence of water or liquids (Yoshida et al., 1998), in non-piezoelectric materials (Freund and Borucki,  
15 1999), and in materials under non-elastic conditions (Triantis et al., 2012). Thus, a simple model for the  
16 study of current generation by stress changes is the so-called Motion of Charged Edge Dislocations (MCD),  
17 which consists of the movement of charges due to the generation of microcracks within a brittle and semi-  
18 brittle material similar to the crust that has undergone a stress change (Triantis et al., 2012). Once the  
19 physical mechanism that generates magnetism by stress changes has been found, it is essential to study the  
20 temporal evolution of the lithospheric system, which is referred to in group 2.  
21  
22

23 2.- According to De Santis et al. (2011) and De Santis et al. (2014), the measurement of the temporal  
24 evolution of stress is achieved by measuring the "Earthquake Entropy", since the occurrence of an  
25 earthquake is an irreversible process comparable to a "critical system", due to the irreversible change in the  
26 state of such system, i.e. from a high-stress to a lower-stress lithosphere during an earthquake (De Santis et  
27 al., 2017). However, in order to correctly apply the stress configuration in an area of the lithosphere, it is  
28 necessary to know the "b-value" of Gutenberg-Richter's empirical law, since according to Schorlemmer et  
29 al. (2005), this value can be interpreted as a type of inverse measure of stress and therefore the temporal  
30 evolution of "b-value" could be related to the temporal evolution of stress and magnetic field through group  
31 1.  
32

33 3.- Once the evolution of the stress has been determined according to the magnetic field, the calculation of  
34 the Seismic Moment and the Moment Magnitude of Earthquakes will be carried out by using the co-seismic  
35 magnetic field since, as stated by Utada et al. (2011), a possible co-seismic magnetic variation of 0.8 nT  
36 was recorded at about 100 km from the Tohoku 2011 Mw9.0 earthquake rupture area while Johnston et al.  
37 (2006) also reported changes in the magnetic field close to earthquake fault during the Parkfield 2004 M6.0  
38 earthquake and during the Loma Prieta 1989 Mw7.1 earthquakes also were reported possible co-seismic  
39 changes in magnetic field (Karakeliana et al., 2002).  
40

41 4.- One of the most important group of measurements corresponds to the recording of ultra-low frequency  
42 (ULF) magnetic signals, i.e. frequencies below 1 Hz, as many researchers have found such anomalous  
43 frequencies prior to or during earthquake, mainly close to mHz and  $\mu$ Hz (Fenoglio et al., 1995; Sorokin and  
44 Pokhotelov, 2010; Schekotov and Hayakawa, 2015; De Santis et al., 2017; Cordaro et al., 2018, 2019;  
45 Marchetti and Akhoondzadeh, 2018; among others), although according to Vallianatos and Tzanis (2003)  
46 the magnetic field oscillation frequencies that could be related to earthquakes have a range of at least three  
47 orders of magnitude, so that kHz variations measured by other groups could also be included (Rozhnoi et  
48 al., 2008; Büyüksaraç et al., 2015; Potirakis et al., 2018a; among others).  
49

5.- A final aspect to consider is the origin of the possible magnetic variations studied. The great problem of the LAIC effect is the lack of certainty about the mechanism that generates currents towards the atmosphere and ionosphere. Some authors consider that the currents are of external origin to the lithosphere (e.g. Marchetti and Akhoondzadeh, 2018), while others suggest internal origin (e.g. Vallianatos and Tzanis, 2003). To avoid this lack of consensus, it is essential to be able to define the approximate place where the currents are created and to explain the measurements of all the research groups during non-co-seismic times.

After the general description of each of these five topics, each theoretical framework is developed in sections 2, 3, 4, 5 and 6 respectively, maintaining the same order set out in this introduction. Finally, Section 7 summarizes the calculations and results obtained, and where the conclusions reached are presented.

## 2 Rock physics, stress change, current generation and magnetic field

The Zener-Stroh mechanism explains the generation and propagation of microcracks within a solid as the pile-up of edges dislocations at a certain location due critical external mechanical stress or load (e.g. Stroh, 1955). The movement of an edge dislocation stops when they encounter an obstacle or barrier within the solid (a scheme is shown in Figure 1a). Other edges dislocations may also reach the obstacle and will begin to pile up if they cannot overcome that obstacle (Figure 1b). This stacking will create a shear stress  $\tau$ , which will create a microcracks (blue triangle in Figure 1b) (e.g. Fan, 1994 and references therein). The microcracks can continue the propagation through different paths within the material (e.g. Xie and Sanderson, 1995) (blue lines in Figure 1c). This will generate avalanches of cracks due to the nucleation of neighboring cracks, which will allow large-scale cracks (blue lines in Figure 1d)(e.g. Main et al., 1993; Wang et al., 2015 and references therein).

For the other hands, the edges dislocations are electrically neutral in thermal equilibrium (Whitworth, 1975). However, the generation of microcracks is a dynamic process that breaks the ionic bonds that hold the solid together, so the microcracks will be accompanied by polarization and current density (e.g. Vallianatos and Tzanis, 1999). This phenomena is known as the Motion of Charged Edge Dislocations model (MCD model) (A scheme of polarization by MCD model is shown in Figure 1b, d). Several authors have shown that it is possible to detect electrification when a rock sample is compressed (Pressure Stimulating currents) uniaxially as shown in Figure 2a (e.g. Stavrakas et al., 2004 and references therein). It is thought that the electrification is due to the MCD model and it can scale with the rock fracture (Figure 1d) (e.g. Vallianatos and Triantis, 2008). According to Tzanis and Vallianatos (2002) the generation of a current density  $J$  within rocks can be represented as the temporal change in plastic deformation that rocks undergo under compressional stress changes with time ( $d\sigma/dt$ ) by:

$$J = \frac{\sqrt{2} q_l}{\beta b} \left( \frac{1}{Y_{eff}} \frac{d\sigma}{dt} \right) \quad (1)$$

Where  $q_l$  is the linear charge density of edge dislocation,  $b$  is the Burgers vector module,  $\beta$  varies between 1 and 1.5 and corresponds to the ratio  $(\Lambda^+ + \Lambda^-)/(\Lambda^+ - \Lambda^-)$ .  $\Lambda^+$  and  $\Lambda^-$  represent dislocations number created by compression and uniaxial tension within a rock (Whitworth, 1975; Vailianatos and Tzanis, 1998), and  $Y_{eff}$  is the Young's effective module (Turcotte et al., 2003). Figure 2b is a schematic showing the direction of main currents  $J$  when the stress  $\sigma$  changes with time. The currents would tend to be parallel to the axes of fracture, however, the electrification of rocks can also propagate in other directions within the rock samples (Saltas et al., 2018) (Figure 1d).

1 On the other hand, Vallianatos and Tzanis (2003) model the magnetic field on the lithosphere surface as the  
 2 magnetic field measured at the interface (with  $r$  and  $\theta$  coordinates) of a conductive half-space (since the  
 3 rocks could become (semi)conductive when they undergo stress changes (Freund, 2003; Anastasiadis et al.,  
 4 2004)). Then, the magnetic field could be created by a polarized sphere embedded in this conductive  
 5 medium (Griffiths, 1996; Vallianatos and Tzanis, 2003). A scheme can be seen in Figure 3. According to  
 6 Vallianatos and Tzanis, 2003, the magnetic field on the surface of the lithosphere is determined by:

$$7 \quad \vec{B}(t) = \frac{3\mu_m V}{4\pi r^2} \sin \theta \frac{\partial P_2}{\partial t} \hat{z} \quad (2)$$

8  
 9  
 10 Where  $\mu_m$  is the magnetic permeability of the medium (half-space),  $J_2 = \frac{\partial P_2}{\partial t}$  is the horizontal current  
 11 density,  $r$  the distance to the sphere and the volume of the polarized sphere embedded in a medium. Equation  
 12 2 is valid for any source that generates polarization changes in the medium. According to Vallianatos and  
 13 Tzanis (2003) if electric current is generated by microcracks then has a volume lower than  $V$ . This can be  
 14 seen from the scheme of Figure 1d, where microcracks are represented by blue lines and do not cover the  
 15 entire volume. The paths of these microcracks and their distribution are fractal in nature (e.g. Xie and  
 16 Sanderson, 1995; Uritsky et al., 2004). According to Turcotte (1997), the fractal volume of all the  
 17 microcracks within the medium can be represented by:

$$18 \quad V \approx \frac{4\pi}{3} \frac{AD}{3-D} (l_{max})^{3-D} S_R \quad (3)$$

19  
 20  
 21 Where  $l_{max}$  is the radius of the largest microcracks,  $D$  is the rock fractal dimension,  $S_R$  is a factor defined  
 22 by  $S_R = (1 - (\frac{l_{min}}{l_{max}})^{3-D})$ , where  $l_{min}$  is the radius of the smallest microcrack. It is assumed that the ratio  
 23  $(\frac{l_{min}}{l_{max}})$  is small, so  $S_R \approx 1$ . The factor  $A \approx (D - 2)(l_{min})^{D-2} S$  appears from the fractal integration of the  
 24 microcrack. Where  $S$  is the largest fracture area. Therefore, the maximum magnetic field ( $\sin \theta = \pi/2$ ) is  
 25 reached by replacing Equation 3 in 2:

$$26 \quad B \approx \frac{\mu_m AD}{(3-D)r^2} (l_{max})^{3-D} J_2 \quad (4)$$

27  
 28  
 29 If  $J_2$  corresponds to the total current density  $J$  present in the half-space, then Equation 1 may be replaced  
 30 in 6:

$$31 \quad B \approx \frac{\sqrt{2}q_l \mu_m AD}{(3-D)\beta br^2} (l_{max})^{3-D} \left( \frac{1}{Y_{eff}} \frac{d\sigma}{dt} \right) \quad (5)$$

32  
 33  
 34 The only amounts that are explicitly time-dependent are  $B$  and  $\frac{d\sigma}{dt}$  so that at the end, the temporal evolution  
 35 of stress is proportional to the temporal integral of the magnetic field:

$$36 \quad \sigma(t) = k(Y_{eff}) \int B(t) dt \quad (6)$$

37  
 38 With  $k(Y_{eff}) = \left( \frac{\sqrt{2}q_l \mu_m AD}{(3-D)\beta br^2} \frac{(l_{max})^{3-D}}{Y_{eff}} \right)^{-1}$ ,  $k$  in units of A/m/s, or magnetization per seconds. The Equation  
 39 6 shows that it is possible to use the magnetic field to measure the evolution of stress in laboratory rocks.  
 40 While  $k$  represents the geometric and mechanical properties of the source of electrification in laboratory

1 rocks. If these experiments are correct, it would be expected that the magnetic field could reveal changes of  
2 stress on a geodynamic scale.

### 3 **3 b-value, earthquake entropy, magnetic field and critical system**

4  
5  
6 The seismicity of an area is statistically determined by Gutenberg-Richter's law on a geodynamic scale  
7 (Gutenberg and Richter, 1944). This law shows the number of earthquakes  $N$  with magnitude equal to or  
8 greater than  $M$  under the logarithmic relation:  $\log N = a - bM$  and where parameters  $a$  and  $b$  depend on  
9 each study area. Each earthquake is generated by a sudden release of energy that is not recovered, so the  
10 Gutenberg-Richter's law describes the occurrence of a set of irreversible events (e.g. Stein and Wyssession,  
11 2003). Since parameters  $a$  and  $b$  give information about the stress conditions in which these irreversible  
12 events occur, De Santis et al. (2011) developed the concept of earthquake entropy  $H$  based on Shannon  
13 entropy. Shannon's entropy measures the information of a system and its changes, however, the information  
14 of this system corresponds to the stress states of the lithosphere. In this way, the concept of earthquake  
15 entropy can be understood as the measure of the transition between different states of stress in the  
16 lithosphere. Using this, De Santis et al. (2011) found that the temporal variation of b-value of Gutenberg-  
17 Richter's law is related to earthquake entropy  $H(t)$  through:

$$18 \quad b(t) = b_{max} 10^{-H(t)} \quad (7)$$

19  
20 Where  $b_{max} = e \log_{10} e$ , which is constant. As  $H(t)$  can be understood as the measure of lithospheric stress  
21 (De Santis et al., 2011), the earthquake entropy can be directly related to stress through:  $H(t) \equiv k_0 \sigma(t)$ ,  
22 where  $k_0$  is in **units** of inverse stress. If the result shown by Equation 6 is self-similar and is also applicable  
23 at geodynamic scale, it implies that the b-value of Gutenberg-Richter's law (Equation 7) can be temporarily  
24 related to the magnetic field (Equation 6) by means of:

$$25 \quad b(t) = b_{max} 10^{-k_0 k(Y_{eff}) \int B(t) dt} \quad (8)$$

26  
27 On the other hand, De Santis et al. (2017), Marchetti and Akhoondzadeh (2018) and Cordaro et al. (2019b)  
28 found that the daily accumulation of magnetic field anomalies before and after the Nepal 2015 Mw7.8,  
29 Mexico 2018 Mw8.2, Maule 2010 Mw8.8, Iquique 2014 Mw8.2 and Illapel 2015 Mw8.3 earthquakes had  
30 a behavior similar to that of a critical system so the shape of the magnetic field can be approximated to a  
31 sigmoid function:  $B \sim (1 + e^{-(t-t_0)})^{-1}$  (Figure 4 upper panel). The integral of the sigmoid is shaped:  
32  $\ln(1 + e^{t-t_0})$ , so by choosing  $k(Y_{eff}) = 1$  and  $t_0 = 10$  in Equation 8, it may show the b-value temporal  
33 evolution (Figure 4 lower panel). In it, the b-value decreases before an earthquake, suggesting that there  
34 must be a change in the lithospheric regime (to an imminent collapse) because of increased seismicity prior  
35 to the occurrence of an earthquake, i.e., the existence of seismic or foreshock swarms (Schorlemmer et al.,  
36 2005; Ruiz and Madariaga, 2018). This is consistent with other research that suggests that a b-value decrease  
37 may serve as an earthquake predictor since a decreasing b-value means that earthquakes of higher  
38 magnitudes are required in order to satisfy the Gutenberg-Richter's law (Imoto, 1991; Kulhanek et al., 2018).

### 39 40 41 42 **4 Seismic Moment, Moment Magnitude and Co-Seismic Magnetic Field**

43  
44  
45 The area  $S$  **that is implicit in the factor  $A$  in** Equation 4 is considered to calculate the co-seismic magnetic  
46 relation  $B_{CS}$  with earthquakes, since it may correspond to the rupture area (Turcotte, 1997):  
47

$$S \approx \frac{B_{cs} r^2 (3-D)}{\mu_m J_2 D(D-2)} (l_{min}^{2-D})(l_{max}^{D-3}) \quad (9)$$

By replacing Equation 9 in the Scalar Seismic Moment equation  $M_0$  ( $M_0 = \mu A d \approx \mu S d$ ), where  $\mu$  is the shear modulus and  $d$  the average slip) there is (Aki, 1966):

$$M_0 \approx \mu \frac{B_{cs} r^2 (3-D)}{\mu_m J_2 D(D-2)} (l_{min}^{2-D})(l_{max}^{D-3}) d \quad (10)$$

With the Scalar Seismic Moment it is possible to calculate the Moment Magnitude Scale  $Mw$  ( $Mw = \frac{2}{3} \log_{10}[M_0 \times 10^7] - 10.7$ , for  $M_0$  in  $Nm$  units, and where  $10^7$  has  $(Nm)^{-1}$  units, Hanks and Kanamori, 1979). Then, according to the co-seismic magnetic field the Moment Magnitude is:

$$Mw \approx \frac{2}{3} \log_{10} \left[ \left( \mu \frac{B_{cs} r^2 (3-D)}{\mu_m J_2 D(D-2)} (l_{min}^{2-D})(l_{max}^{D-3}) d \right) \times 10^7 \right] - 10.7 \quad (11a)$$

If we consider the fractal dimension of granite ( $D = 2.6$ ) (Turcotte, 1997) we have a more compact version of Equation 11a:

$$Mw \approx \frac{2}{3} \log_{10} \left[ \left( \frac{1}{3.9} \frac{\mu B_{cs}}{\mu_m J_2} \frac{dr^2}{(l_{min}^{0.6})(l_{max}^{0.4})} \right) \times 10^7 \right] - 10.7 \quad (11b)$$

Utada et al., (2011) reported a variation of  $B_{cs} = 0.8$  nT at a distance  $r$  of the order of 100km from the fault plane during the Tohoku Earthquake 2011 Mw9.0 (Table 1). If we consider a minimum fracture of  $l_{min} \approx 10^{-3}$  m (Shah, 2011), for granite  $\mu_m = 13.5 \times 10^{-7}$  N/A<sup>2</sup> (Scott, 1983),  $J_2 = 5 \times 10^{-6}$  A/m<sup>2</sup> (Tzanis and Vallianatos, 2002). In addition to the data provided by the USGS  $S = 625 \times 260$  km<sup>2</sup>,  $d = 5.27$  m,  $\mu = 57$  GPa, where  $l_{max} = \sqrt{S/\pi}$ , the Moment Magnitude calculated with the magnetic field must be:

$$Mw \approx \frac{2}{3} \log_{10} [(4.1463 \times 10^{22}) \times 10^7] - 10.7 = 9.0 \quad (12a)$$

On the other hand, Johnston et al. (2006) reported changes in the magnetic field at several stations fairly close to Parkfield 2004 M6.0 earthquake (Table 1). For instance, the station GDM (Latitude: 35.8420; Longitude: -120.3380) measured a variation of  $B_{cs} = 0.3$  nT at a distance  $r \approx 2.5$  km from the fault. Using the general values  $\mu_m, J_2$  and  $l_{min}$  and the earthquake information:  $\mu = 30$  GPa (Barbot et al., 2009),  $S \approx 20 \times 10$  km<sup>2</sup> (Kim and Dreger, 2008) and  $d = M_0/(\mu S) = 0.22$  m, with  $M_0 = 1.3 \times 10^{18}$  Nm (Kim and Dreger, 2008). Moment Magnitude calculated with the magnetic field is:

$$Mw \approx \frac{2}{3} \log_{10} [(8.1545 \times 10^{17}) \times 10^7] - 10.7 = 5.9 \quad (12b)$$

The last example corresponds to the Loma Prieta 1989 M7.1 earthquake (Table 1). During the earthquake, at a distance of  $r \approx 7$  km (Corralitos station) a peak of 0.9 nT that excelled the intense (non-seismic) magnetic noise was measured (Fenoglio et al., 1995; Karakeliana et al., 2002; Thomas et al., 2009). Using the same values of this section  $\mu_m, J_2$  and  $l_{min}$  and for this earthquake:  $B_{cs} = 0.9$  nT,  $r \approx 7$  km (Karakeliana et al., 2002),  $\mu = 30$  GPa and  $S \approx 40 \times 10$  km<sup>2</sup> (Wallace and Wallace, 1993),  $d = 1.2$  (Berkeley Seismology Lab), the Moment Magnitude calculated is:

$$Mw \approx \frac{2}{3} \log_{10} [(9.1073 \times 10^{19}) \times 10^7] - 10.7 = 7.2 \quad (12c)$$

1 The result of Equation 12a, b and c are similar to the real one, therefore Equation 11 is valid for the following  
 2 analyses. The expected co-seismic magnetic field can be obtained from Equation 11b in accordance with  
 3 distance:

$$4 \quad B_{cs} \approx 3.9 \frac{\mu_m J_2 (l_{min}^{0.6}) (l_{max}^{0.4})}{\mu d r^2} 10^{\frac{3}{2}(Mw+6)} \quad (13)$$

5 The factor  $10^{\frac{3}{2}(Mw+6)}$  here holds Nm units. Keeping the same values of  $\mu_m$ ,  $J_2$  and  $l_{min}$  used so far, plus  
 6 the data for the Tohoku 2011, Maule 2010, Sumatra 2004, Illapel 2015, Parkfield and Loma Prieta  
 7 earthquakes (Table 1) the expected co-seismic magnetic variation for these events can be observed in Figure  
 8 5. This Figure also shows that co-seismic magnetic variations can reach hundreds of kilometers of radial  
 9 distance from the rupture area. Even these variations can reach the ionosphere (48 km high from Earth's  
 10 surface [https://www.nasa.gov/mission\\_pages/sunearth/science/atmosphere-layers2.html](https://www.nasa.gov/mission_pages/sunearth/science/atmosphere-layers2.html)), which could  
 11 disturb the electron density within the ionosphere (Astafyeva et al., 2013; Kelley, 2017; Marchetti and  
 12 Akhoondzadeh, 2018; Potirakis et al., 2018b). According to Kelley et al. (2017), it is possible to propagate  
 13 a disturbance in the ionosphere if there is an electric field of the order of  $\sim 0.5$  mili Volt/meter at  $\sim 90$  km  
 14 from the earth's surface. This is  $\sim 10^{-3}$  nT in magnetic terms if we consider  $E = cB$ , with  $c = 3 \times 10^8$  m/s,  
 15 the speed of light. Kelley et al. (2017) also claim that the electrical disturbance required at Earth's surface  
 16 should be close to  $\sim 0.2$  V/m or  $\sim 0.6$  nT. Figure 5 shows that the condition of  $\sim 10^{-3}$  nT at  $\sim 90$  km  
 17 from the earth's surface and  $\sim 0.6$  nT at Earth's surface ( $\sim 10 - 20$  km from epicenter) is reached for all  
 18 earthquakes studied whit moment magnitude greater than  $\sim Mw7$ . Therefore, ionospheric disturbances  
 19 would not be expected for earthquakes with moment magnitudes less than  $\sim Mw7$ .

## 21 5 Ultra Low Frequency Magnetic Signals

22  
 23 After establishing the magnitude of the expected co-seismic magnetic field, it is necessary to determine the  
 24 order of magnitude of the oscillations present in the magnetic field. With this purpose, we consider that the  
 25 current density is oscillating and can be expressed as a function of the polarization density as:  $J = \dot{P} = \omega P_0$ ,  
 26 so replacing the above in Equation 13 the following result is obtained:

$$29 \quad \omega \approx \frac{1}{3.9} \frac{\mu}{\mu_m} \frac{dr^2 B_{cs}}{(l_{min}^{0.6}) (l_{max}^{0.4}) P_0} 10^{-\frac{3}{2}(Mw+6)} \quad (14)$$

30  
 31  
 32 Where  $P_0 = \delta \Lambda q_l dx / \sqrt{2}$  (Vallianatos and Tzanis, 1998), where the displacement of the fracture  $dx$  is  
 33 normally comparable to the Burgers vector and has a typical value of  $5 \times 10^{-10}$  m (Slifkin, 1993), a  
 34 minimum excess dislocation  $\delta \Lambda = 1 \times 10^8$  m<sup>-2</sup> in semiconductor materials (JAMS-CS, 1999) and the  
 35 electrical charge line  $q_l \sim 10^{-11}$  C/m (Slifkin, 1993). Considering  $l_{min} \approx 10^{-3}$  m (Shah, 2011),  $\mu_m =$   
 36  $13.5 \times 10^{-7}$  N/A<sup>2</sup> (Scott, 1983),  $J_2 = 5 \times 10^{-6}$  A/m<sup>2</sup> (Tzanis and Vallianatos, 2002). Also the data for the  
 37 2010 Tohoku earthquake from Table 1 and  $B_{cs} = 0.8$  nT and  $r = 100$  km (Utada et al., 2011), the frequency  
 38 of the magnetic field oscillation associated with the 2011 Tohoku earthquake is of the order of  $10^6$  Hz;  
 39 however, the co-seismic displacement  $dx$  is not comparable to the Burgers vector but to the average  
 40 displacement  $d$ , i.e.,  $dx \approx d = 5.27$  m, so the magnetic field oscillation frequency is:

$$42 \quad \omega \sim 1.7 \text{ mHz} \quad (15)$$

43  
 44 Oscillations of the order of mHz have been detected by De Santis et al., (2017), which is consistent with  
 45 Equation 15, although frequencies of the order of  $\mu$ Hz have been detected by Cordaro et al. (2018).

1 However, according to Vallianatos and Tzanis (2003), the frequency of magnetic field oscillation associated  
 2 with earthquakes is manifested in a range of at least three orders of magnitude, and this coincides with the  
 3 measurements of Cordaro et al. (2018) ( $\mu\text{Hz}$ ) and De Santis et al., (2017) ( $\text{mHz}$ ). The above information  
 4 implies that in order to generate oscillation frequencies of the magnetic field in the pre-seismic stage similar  
 5 to the co-seismic frequencies, polarizations  $P_0$  and current densities  $J$  within lithosphere should be similar  
 6 to those found in the co-seismic stage ( $P_0 \sim 3.7 \times 10^{-3} \text{ C/m}^2$  and  $J \sim 5 \times 10^{-6} \text{ A/m}^2$ ) and even these  
 7 electrical conditions should be in some places of the lithosphere away from the fracture zone (main fault)  
 8 (Scoville, et al., 2015). On the other hand, if the polarization is similar and the current density is lower,  
 9 frequencies lower than those presented in Equation 15 are obtained. For example, if the lithosphere  
 10 polarization is maintained in the pre-earthquake stage and the current density decreases by two orders of  
 11 magnitude (i.e.  $J \sim 10^{-8} \text{ A/m}^2$ ) it is possible to obtain frequencies of the order of the  $\mu\text{Hz}$  ( $\omega = J/P_0 \sim$   
 12  $10^{-6} \text{ Hz}$ ), which means that according to Equation 1, to create lower magnetic frequencies there must be a  
 13 lower stress change.

14  
 15 On the other hand, equation 14 depends on  $l_{max}$  and corresponds to the maximum radius of the rupture area  
 16 of an earthquake. This implies that at other times there will be a lower  $l_{max}$  and therefore higher frequencies.  
 17 In addition, we must remember that  $l_{max}$  was calculated using the microcracks fractality. This means that  
 18  $l_{max}$  can have a large range of orders of magnitude. Therefore, the oscillation frequency of the magnetic  
 19 field associated with earthquakes must also have a fractal nature. This fractal property in magnetic  
 20 measurements had already been found by other researchers prior to the occurrence of earthquakes (e. g.  
 21 Potirakis et al., 2017 and references therein).

## 22 23 24 **6 Location of microcracks**

25  
 26 Cordaro et al. (2019b) showed that the intensity of the magnetic field that they considered anomalous prior  
 27 to the occurrence of the earthquakes of Maule 2010, Iquique 2014 and Illapel 2015 were of the order of  $\sim$   
 28  $0.2 \text{ nT}$ . This value is close to the one that Kelley et al. (2017) indicates to propagate disturbances in the  
 29 ionosphere. If we also consider that Marchetti and Akhoondzadeh (2018) found anomalous behaviors  
 30 similar to those found by Cordaro et al. (2019b) in the magnetic field, but using satellites, it can be suggested  
 31 that  $\sim 0.2 \text{ nT}$  is the magnetic variation created in the lithosphere prior to the occurrence of an earthquake.  
 32 However, it is necessary to estimate the place in the lithosphere where these cracks might be occurring. It  
 33 is also necessary to determine the order of magnitude of the microcracks dimensions within lithosphere.

34  
 35 If we consider the case of the OSO station ( $40^\circ 20' 24''\text{S}$ ,  $73^\circ 05' 24.0''\text{W}$ ) in Cordaro et al. (2019b), we can  
 36 note that it is  $\sim 450 \text{ km}$  from the epicenter of the 2010 Maule earthquake ( $36^\circ 17' 24.0''\text{S}$   $73^\circ 14' 20.4''\text{W}$ ).  
 37 As in this case we only want to calculate the orders of magnitude of the microcracks and their location, we  
 38 will consider the general version of Equation 2, which is shown in Equation 16 (Griffiths, 1996; Vallianatos  
 39 and Tzanis, 2003).

$$40 \quad \vec{B}(x_0, y_0, h) = \frac{3\mu_m V \vec{J} \times \vec{r}}{8\pi r^3} \quad (16)$$

41 Where  $V$  is the fractal volume defined in Equation 3,  $x_0$  and  $y_0$  are the point near the surface of the  
 42 lithosphere where the station is located, and  $h$  the depth of the microcrack. This depth  $h$  corresponds to the  
 43 semi brittle-ductile transition and is between 10 and 20 km deep (Scholz, 2001; Sun, 2011). For these  
 44 calculations we will consider that  $h = -15 \text{ km}$ . If we consider that the microcracks are occurring in the  
 45 future earthquake rupture zone, in addition to the data in Table 2, it would imply that the microcracks would  
 46 have dimensions of the order of  $\sim 300 \text{ m}$  to obtain more than  $\sim 0.2 \text{ nT}$  at  $\sim 450 \text{ km}$ . The result of using  
 47 this microcrack length and Table 2 is shown in Figure 6. Using the same values, we find that greater



1 magnetic variations exist closer to the future seismic rupture zone. For example, within a radius of 100 km  
2 there are magnetic variations of 10 nT (white circle in Figure 7), while within a radius of 10 km there would  
3 be variations of the order of 160 nT (magenta circle in Figure 7). These variations have never been recorded,  
4 therefore microcracks cannot be of the order of hundreds of meters, but must be smaller. Neither can they  
5 come from the future seismic source.

6 On the other hand, if we consider that microcracks are occurring near the stations, it is enough to take an  
7  $\sim 30$  m to obtain magnetic variations similar to those found in Cordaro et al. (2019b). In Figure 8 it is  
8 shown that with this configuration the measurements can be replicated. However, it is necessary that  
9 microcracks with  $l_{max}$  of the order of tens of meters should be occurring in different places of the  
10 lithosphere.

## 14 7 Summary and conclusions

16 This work studied the role of the magnetic field in the lithospheric dynamics; specifically, the physics that  
17 could be associated with various measurements that relate magnetic fields and earthquakes in a complete  
18 cycle, i.e. from a stress disturbance to the magnetic frequencies correlated with the occurrence of an  
19 earthquake. The results of each section are below:

21 Since a change in stress could trigger an earthquake, section two discussed the way a change in stress causes  
22 fractures within the rocks, the flow of electrical currents and the generation of magnetic fields. Therefore,  
23 the goal of this section was to achieve a relationship (equation 6) between the temporal evolution of stress  
24 with the integral over time of the magnetic field through a constant  $k$ . It was also possible to store all the  
25 electrical and mechanical information of the rocks in the constant  $k$ , which represent the magnetization per  
26 second of the rocks.

28 The goal of section three is of great relevance since it established a relationship between the behavior of the  
29 magnetic field (critical system) and a b-value decrease of the Gutenberg-Richter Law before and after the  
30 occurrence of earthquakes through earthquake entropy concept (Equation 8 and Figure 4). This was possible  
31 by assuming that the behavior of laboratory samples would exhibit the same physics as lithospheric rocks.  
32 Another goal of this section was to obtain a more physical interpretation about the entropy of earthquakes,  
33 its relation with magnetism and the impending earthquakes: As entropy can be considered as the energy  
34 diffusion of a system, the accumulation of stress (energy) in the lithosphere (open system) must be diffused.  
35 This means that the increment in the number of magnetic anomalies and their relationship with an increase  
36 in seismicity (earthquake swarms and/or seismic precursors) prior to the occurrence of large earthquakes  
37 are part of the energy diffusion mechanisms. However, this may also be interpreted inversely: The non-  
38 existence of seismic and magnetic precursors could violate the second law of thermodynamics. However,  
39 more studies are needed to corroborate whether the emission of magnetic signals really has any relationship  
40 with the entropy of earthquakes.

42 The great goal of section 4 was to find and corroborate an analytical relationship between co-seismic  
43 magnetic measurements and the magnitude of earthquakes (Equations 11a, b). It was possible to obtain  
44 Equations 11a, b by considering the area of rupture of the earthquake as a crack of the MCD model. Another  
45 goal of this section was to find an analytical relationship that would allow to determine the magnitude of  
46 co-seismic magnetic signals as a function of the epicentral distance (Equation 13). Figure 5 shows the  
47 intensity of the expected co-seismic magnetic variation for several earthquakes as a function of the distance  
48 to the area of rupture. It is observed that magnetic variations can easily reach the ionosphere for earthquakes  
49 of magnitudes greater than Mw8.3 (dashed blue line). Many magnetometers have the resolution of 0.1 nT

1 (dashed red line) so magnetic variations produced by large earthquakes ( $\sim M_w 9$ ) could be detectable by  
2 magnetometers several hundred kilometers from the area of rupture. However, it is not expected that the  
3 magnetometers can detect magnetic variations related to small earthquakes, i.e. magnitudes much lower  
4 than  $M_w 8.0$  and tens of km from the source. For instance, during the L'Aquila 2009  $M_w 6.1$  earthquake  
5 (central Italy), large magnetic variations were reported associated with displacements of the instruments due  
6 seismic waves (0.8 nT) at 6.7 km away from the source of the earthquake (Nenovski, 2015; Masci and  
7 Thomas, 2016). However, using  $r \approx 6.7$  km (Nenovski, 2015),  $M_w = 6.1$ ,  $\mu = 32 \times 10^9$  Pa,  $d = 0.4$  m  
8 and  $S = 19 \times 13$  km<sup>2</sup> (Walters et al., 2019) and the same values of  $\mu_m$ ,  $J_2$  y  $l_{min}$  used in section 5 into  
9 Equation 13 the expected co-seismic magnetic field is  $B_{cs} \approx 0.04$  nT, which is quite close to the  
10 instrumental noise of the L'Aquila station (0.02 nT) (Villante et al., 2010), making these magnetic co-  
11 seismic variations almost undetectable.

12  
13  
14 The goal of section 5 was to theoretically find the oscillation frequencies of the magnetic field that may be  
15 related to the occurrence of earthquakes. They were found to have frequencies of the order of mHz. The  
16 existence of frequencies of different orders of magnitude or fractal nature of oscillations prior to earthquakes  
17 were also analyzed. It is concluded that for there to be magnetic variations in the lithosphere prior to  
18 earthquakes it is necessary that the conditions of polarization and density of currents are similar to those  
19 that can be found in the co-seismic stage. All these magnetic variations are part of the ULF reported by  
20 several authors.

21  
22 Section 6 looked for the location of the microcracks and their size. It was found that microcracks are unlikely  
23 to be created in the future seismic rupture zone. However, if micro cracks of the order of 30 m exist at depths  
24 of 10-20 km, it is possible to explain the expected magnetic variations ( $\sim 0.2$  nT). This implies that  
25 microcracks must be occurring throughout the lithosphere due to a change in the stress field.

26  
27 On the other hand, the physics of the co-seismic stage (section 4) and the stage prior to earthquakes (section  
28 6) could be the same: microcracks. Where the only difference comes from the size of  $l_{max}$ . This is relevant  
29 since in the future it will be necessary to investigate microcracks as a factor that allows propagation of  
30 seismic fractures. In addition, it will also be necessary to study the distribution of microcracks throughout  
31 the lithosphere. This would allow to estimate the places where it is more likely to find magnetic variations  
32 as well as possible future earthquakes.

33  
34 Finally, it can be concluded that the controversial magnetic phenomena registered by different research  
35 groups, behavior of cumulative daily number of magnetic anomalies, co-seismic magnetic field and  
36 oscillation frequencies of the magnetic field, can all have the same and unique physical origin: the cracking  
37 of brittle and semi brittle materials of the crust due to stress changes. However, there is still no clarity  
38 about how these stress changes can generate the nucleation of earthquakes. Therefore, future studies should  
39 focus on interpreting magnetic records as a tool to measure stress changes in the lithosphere. Especially  
40 when there are no appreciable deformations of the lithosphere. This could provide new information to  
41 seismic source studies.

## 42 43 44 **Acknowledgements**

45  
46 P.V.-A. acknowledges Patricia Aravena, Alejandro Venegas, Patricia Venegas and Richard Sandoval for  
47 outstanding support to carry out this work, and Valeria Becerra-Carreño for her scientific support. D. L.  
48 acknowledges partial financial support from Centers of excellence with BASAL/CONICYT financing, grant  
49 FB0807, CEDENNA.

## 1 **References**

2  
3  
4 Aki, K.: Generation and propagation of G waves from the Niigata earthquake of June 14, 1964. Part 2.  
5 Estimation of earthquake moment, released energy and stress-strain drop from G wave spectrum. Bulletin  
6 of the Earthquake Research Institute, 44: 73–88, 1966.

7  
8 Anastasiadis, C., Triantis, D., Stavrakas, I. and Vallianatos, F.: Pressure Stimulated Currents (PSC) in  
9 marble samples. *Ann. Geophys.*, 47, 1, pp. 21-28, 2004.

10  
11 Astafyeva, E., Shalimov, S., Olshanskaya, E., and Lognonné, P.: Ionospheric response to earthquakes of  
12 different magnitudes: Larger quakes perturb the ionosphere stronger and longer. *Geophysical Research*  
13 *Letters*, Vol. 40, 1675–1681, doi:10.1002/grl.50398, 2013.

14  
15 Balasis, G. and Manda, M.: Can electromagnetic disturbances related to the recent great earthquakes be  
16 detected by satellite magnetometers? *Tectonophysics*, 431, 173–195, 2007.

17  
18 Barbot, S., Fialko, Y. and Bock, Y.: Postseismic deformation due to the Mw 6.0 2004 Parkfield earthquake:  
19 Stress-driven creep on a fault with spatially variable rate-and-state friction parameters. *Journal of*  
20 *Geophysical Research*, Vol. 114, B07405, doi:10.1029/2008JB005748, 2009.

21  
22 Büyüksaraç A., Pinar, A. and Koşaroğlu, S.: Precursory Anomaly in VLF/LF Recordings Prior to the  
23 Çaglayan (Erzincan-Turkey) Earthquake on July 30th, 2009. *Bitlis Eren Univ J Sci & Technol* 5 (1), 18 -  
24 23, 2015.

25  
26 Cartwright-Taylor, A, Vallianatos, F. and Sammonds, P.: Superstatistical view of stress-induced electric  
27 current fluctuations in rocks. *Physica A* 414 (2014) 368–377, 2014.

28  
29 Cordaro, E.G., Venegas, P. and Laroze, D.: Latitudinal variation rate of geomagnetic cutoff rigidity in the  
30 active Chilean convergent margin. *Ann. Geophys.*, 36, 275–285, [https://doi.org/10.5194/angeo-36-275-](https://doi.org/10.5194/angeo-36-275-2018)  
31 2018, 2018.

32  
33 Cordaro, E.G., Venegas-Aravena, P. and Laroze, D.: Variations of geomagnetic cutoff rigidity in the  
34 southern hemisphere close to 70°W (South-Atlantic Anomaly and Antarctic zones) in the period 1975–  
35 2010. *Advances in Space Research* <https://doi.org/10.1016/j.asr.2018.12.019>, 2019.

36  
37 Cordaro, E.G., Venegas-Aravena, P. and Laroze, D.: Analysis of geomagnetic measurements prior the  
38 Maule (2010), Iquique (2014) and Illapel (2015) earthquakes, in the Pacific Ocean sector of the Southern  
39 Hemisphere, *Ann. Geophys. Discuss.*, <https://doi.org/10.5194/angeo-2019-9>, in review, 2019.

40  
41 Daneshvar, M.R.M. and Freund, F.T.: Remote Sensing of Atmospheric and Ionospheric Signals Prior to the  
42 Mw 8.3 Illapel Earthquake, Chile 2015. *Pure Appl. Geophys.*, 174, 11–45, DOI: 10.1007/s00024-016-1366-  
43 0, 2017.

44  
45 De Santis, A., Cianchini, G., Favali, P., Beranzoli, L. and Boschi, E.: The Gutenberg–Richter Law and  
46 Entropy of Earthquakes: Two Case Studies in Central Italy. *Bulletin of the Seismological Society of*  
47 *America*, Vol. 101, No. 3, pp. 1386–1395, doi: 10.1785/0120090390, June, 2011.

- 1 De Santis, A.: Geosystemics, Entropy and Criticality of Earthquakes: A Vision of Our Planet and a Key of  
2 Access. In: Matrasulov D., Stanley H. (eds) *Nonlinear Phenomena in Complex Systems: From Nano to*  
3 *Macro Scale*. NATO Science for Peace and Security Series C: Environmental Security. Springer, Dordrecht.  
4 DOI: 10.1007/978-94-017-8704-81, 2014.
- 5
- 6 De Santis, A., Balasis, G., Pavón-Carrasco, F.J., Cianchini, G. and Mandeia, M.; Potential earthquake  
7 precursory pattern from space: The 2015 Nepal event as seen by magnetic Swarm satellites. *Earth and*  
8 *Planetary Science Letters* 461, 119–126, <http://dx.doi.org/10.1016/j.epsl.2016.12.037>, 2017.
- 9
- 10 Donner, R.V., Potirakis, S.M., Balasis, G., Eftaxias, K. and Kurths, J.: Temporal correlation patterns in pre-  
11 seismic electromagnetic emissions reveal distinct complexity profiles prior to major earthquakes. *Physics*  
12 *and Chemistry of the Earth* 85–86 (2015) 44–55, 2015.
- 13
- 14 Fan, H.: Interfacial Zener-Stroh Crack. *Journal of Applied Mechanics*, 61(4), 829. doi:10.1115/1.2901564,  
15 1994.
- 16
- 17 Fenoglio, M.A., Johnston, M. J. S. and Byedee, J.: Magnetic and electric fields associated with changes in  
18 high pore pressure in fault zones: application to the Loma Prieta ULF emissions. *J.Geophys. Res.* 100, 12951  
19 – 12958, 1995.
- 20
- 21 Freund, F. and Borucki, J.G.: Charge carrier generation and charge cloud propagation following 100 m/sec  
22 impacts on igneous rocks. In: Hayakawa, M. (Ed.), *Atmospheric and Ionospheric Electromagnetic*  
23 *Phenomena Associated with Earthquakes*. Terra Scientific Publishing Co., Tokyo, pp. 839–857, 1999.
- 24
- 25 Freund, F.: Rocks That Crackle and Sparkle and Glow: Strange Pre-Earthquake Phenomena. *Journal of*  
26 *Scientific Exploration*, Vol. 17, No. 1, pp. 37–71, 2003.
- 27
- 28 Gay, P., Hirsch, P.B. and Kelly, A.: The estimation of dislocation densities in metals from X-ray data. *Acta*  
29 *Metallurgica*, Volume 1, Issue 3, May 1953, Pages 315-319, 1953.
- 30
- 31 Griffiths, D. J.: *Electrodynamics*, 2nd Edition, Prentice Hall, 218–223, 1996.
- 32
- 33 Gutenberg, B. and Richter, C.F.: Frequency of earthquakes in California. *Bull. Seism. Soc. Am.* 34, 185–  
34 188, 1944.
- 35
- 36 Hanks, T. C., and H. Kanamori.: A moment magnitude scale, *Journal of Geophysical Research*, 84, 5, 2348  
37 - 2350, 9B0059, doi:10.1029/JB084iB05p02348, 1979.
- 38
- 39 Hough, S.: *Predicting the unpredictable, the tumultuous science of earthquake prediction*. Published by  
40 Princeton University Press, 41 William Street, Princeton, New Jersey 08540, ISBN 978-0-691-13816-9,  
41 2010.
- 42
- 43 Imoto, M.: Changes in the magnitude—frequency b-value prior to large ( $M \geq 6.0$ ) earthquakes in Japan.  
44 *Tectonophysics*, Volume 193, Issue 4, 10 July 1991, Pages 311-325, 1991.
- 45
- 46 JAMS-CS (Japan Manufacturer's Society of Compound Semiconductor Materials): EPD measurements for  
47 low dislocation density GaAs and InP substrates, *III-Vs Review*, Volume 12, Issue 6, 1999, Pages 32-37,  
48 ISSN 0961-1290, [https://doi.org/10.1016/S0961-1290\(00\)86710-1](https://doi.org/10.1016/S0961-1290(00)86710-1), 1999.
- 49

- 1 Johnston, M. J. S., Sasai, Y., Egbert, G. D. and Mueller, R. J.: Seismomagnetic Effects from the Long-  
2 Awaited 28 September 2004 M 6.0 Parkfield Earthquake. *Bulletin of the Seismological Society of America*,  
3 Vol. 96, No. 4B, pp. S206–S220, September 2006, doi: 10.1785/0120050810, 2006.  
4
- 5 Karakeliana, D., Klemperera, S.L., Fraser-Smith, A.C. and Thompson, G.A.: Ultra-low frequency  
6 electromagnetic measurements associated with the 1998 Mw 5.1 San Juan Bautista, California earthquake  
7 and implications for mechanisms of electromagnetic earthquake precursors. *Tectonophysics* 359 (2002) 65-  
8 79, 2002.  
9
- 10 Kelley, M. C., Swartz, W.E., and Heki, K.: Apparent ionospheric total electron content variations prior to  
11 major earthquakes due to electric fields created by tectonic stresses. *Journal of Geophysical Research: Space*  
12 *Physics*, 122(6), 6689–6695. doi:10.1002/2016ja023601, 2017.  
13
- 14 Kim, A. and Dreger, D.S.: Rupture process of the 2004 Parkfield earthquake from near-fault seismic  
15 waveform and geodetic records. *Journal of Geophysical Research*, Vol. 113, B07308,  
16 doi:10.1029/2007JB005115, 2008.  
17
- 18 Kulhanek, O., Persson, L. and Nuannin, P.: Variations of b-values preceding large earthquakes in the  
19 shallow subduction zones of Cocos and Nazca plates. *Journal of South American Earth Sciences*. Volume  
20 82, March 2018, Pages 207-214, 2018.  
21
- 22 Ma, L., Zhao, J. and Ni, B.: A Zener-Stroh crack interacting with an edge dislocation. *Theoretical and*  
23 *Applied Mechanics Letters* 2, 021003 (2011). doi:10.1063/2.1102103, 2011.  
24
- 25 Main, I.G., Sammonds, P.R. and Meredith, P.G.: Application of a modified Griffith criterion to the evolution  
26 of fractal damage during compressional rock failure, *Geophys. J. Int.* 115 (1993) 367–380, 1993.  
27
- 28 Marchetti, D. and Akhoondzadeh, M.: Analysis of Swarm satellites data showing seismo-ionospheric  
29 anomalies around the time of the strong Mexico (Mw = 8.2) earthquake of 08 September 2017. *Advances*  
30 *in Space Research* 62 (2018) 614–623, <https://doi.org/10.1016/j.asr.2018.04.043>, 2018.  
31
- 32 Masci, F. and Thomas, J.N.: Evidence of underground electric current generation during the 2009 L’Aquila  
33 earthquake: Real or instrumental? *Geophys. Res. Lett.*, 43, 6153–6161, doi:10.1002/2016GL069759, 2016.  
34
- 35 Menke, W., Abend, H., Bach, D., Newman, K. and Levin, V.: Review of the source characteristics of the  
36 Great Sumatra–Andaman Islands earthquake of 2004. *Surveys in Geophysics*, November 2006, Volume 27,  
37 Issue 6, pp 603–613, 2006.  
38
- 39 Morgan, F.D., Williams, E.R. and Madden, T.R.: Streaming potential properties of Westerly granite with  
40 applications. *J. Geophys. Res.* 94, 12449–12461, 1989.  
41
- 42 Nenovski, P: Experimental evidence of electrification processes during the 2009 L’Aquila earthquake main  
43 shock. , *Geophys. Res. Lett.*, 42, 7476–7482, doi:10.1002/2015GL065126, 2015.  
44
- 45 Park, S.K.: Precursors to earthquakes: Seismoelectromagnetic signals. *Surveys in Geophysics*, July 1996,  
46 Volume 17, Issue 4, pp 493–516.  
47
- 48 Paudel, S.R., Banjara, S.P., Wagle, A. and Freund, F.T.: Earthquake chemical precursors in groundwater: a  
49 review. *Journal of Seismology*, pp 1–22, <https://doi.org/10.1007/s10950-018-9739-8>, 2018.

1  
2 Potirakis, S.M., Hayakawa, M. and Schekotov, A.: Fractal analysis of the ground-recorded ULF magnetic  
3 fields prior to the 11 March 2011 Tohoku earthquake (M W = 9): discriminating possible earthquake  
4 precursors from space-sourced disturbances. *Nat Hazards* (2017) 85: 59. [https://doi.org/10.1007/s11069-](https://doi.org/10.1007/s11069-016-2558-8)  
5 [016-2558-8](https://doi.org/10.1007/s11069-016-2558-8).

6  
7 Potirakis, S.M., Contoyiannis, Y., Asano, T. and Hayakawa, M.: Intermittency-induced criticality in the  
8 lower ionosphere prior to the 2016 Kumamoto earthquakes as embedded in the VLF propagation data  
9 observed at multiple stations. *Tectonophysics*, 722, 422-431. 2018a.

10  
11 Potirakis, S.M., Asano, T. and Hayakawa, M.: Criticality Analysis of the Lower Ionosphere Perturbations  
12 Prior to the 2016 Kumamoto (Japan) Earthquakes as Based on VLF Electromagnetic Wave Propagation  
13 Data Observed at Multiple Stations. *Entropy* 2018, 20, 199; doi: 10.3390/e20030199, 2018b.

14  
15 Pulinets, S, Ouzounov, D. and Davidenko, D.: The possibility of earthquake forecasting: learning from  
16 nature. *Geophysical Research Abstracts*. Vol. 20, EGU2018-9191, 2018. EGU General Assembly, 2018.

17  
18 Rozhnoi, A., Solovieva, M., Molchanov, O., Akentieva, O., Berthelier, J.J., Parrot, M., Biagi, P.F. and  
19 Hayakawa, M.: Statistical correlation of spectral broadening in VLF transmitter signal and low-frequency  
20 ionospheric turbulence from observation on DEMETER satellite. *Nat. Hazards Earth Syst. Sci.*, 8, 1105–  
21 1111, 2008.

22  
23 Ruiz, S. and Madariaga, R.: Historical and recent large megathrust earthquakes in Chile. *Tectonophysics*,  
24 Volume 733, 9 May 2018, Pages 37-56, 2018.

25  
26 Saltas V., Vallianatos F., Triantis D. and Stavrakas I.: Complexity in Laboratory Seismology. *Complexity*  
27 *of Seismic Time Series*, pages 239-273, 2018.

28  
29 Saradjian, M.R. and Akhoondzadeh, M.: Prediction of the date, magnitude and affected area of impending  
30 strong earthquakes using integration of multi precursors earthquake parameters. *Nat. Hazards Earth Syst.*  
31 *Sci.*, 11, 1109–1119, 2011.

32  
33 Schekotov, A. and Hayakawa, M.: Seismo-meteo-electromagnetic phenomena observed during a 5-year  
34 interval around the 2011 Tohoku earthquake. *Physics and Chemistry of the Earth*, 85–86, 167-173,  
35 <http://dx.doi.org/10.1016/j.pce.2015.01.010>, 2015.

36  
37 Scholz, C. H.: *The Mechanics of Earthquakes and Faulting*. 2nd edition. Cambridge University Press. ISBN  
38 [978-0-521-65540-8](https://doi.org/10.1017/9780521655408), 2002.

39  
40 Schorlemmer, D., Wiemer, S. and Wyss, M.: Variations in earthquake size distribution across different  
41 stress regimes, *Nature* 437, 539–542, 2005.

42  
43 Scott, J.H.: *Electrical and Magnetic properties of rock and soil*. UNITED STATES DEPARTMENT OF  
44 THE INTERIOR GEOLOGICAL SURVEY. USGS Open-File Report 83-915, 1983.

45  
46 Scoville, J., Heraud, J. and Freund, F.: Pre-earthquake magnetic pulses. *Nat. Hazards Earth Syst. Sci.*, 15,  
47 1873–1880, doi: 10.5194/nhess-15-1873-2015, 2015.

- 1 Sgrigna, V., Buzzi, A., Conti, L., Picozza, P., Stagni, C. and Zilpimiani, D.: Seismo-induced effects in the  
2 near-earth space: Combined ground and space investigations as a contribution to earthquake prediction.  
3 *Tectonophysics*, 431, (2007), 153–171, 2007.
- 4
- 5 Shah, K. P.: *The Hand Book on Mechanical Maintenance. Practical Maintenance.* Compiled by: K P Shah.  
6 <http://practicalmaintenance.net/?p=1135>, 2011.
- 7
- 8 Shrivastava, M. N., González, G., Moreno, M., Chlieh, M., Salazar, P., Reddy, C.D., Báez, J.C., Yáñez, G.,  
9 González, J., and de la Llera, J.C.: Coseismic slip and afterslip of the 2015 Mw 8.3 Illapel (Chile) earthquake  
10 determined from continuous GPS data, *Geophys. Res. Lett.*, 43, 10, 710–10, 719,  
11 doi:10.1002/2016GL070684, 2016.
- 12
- 13 Slifkin, L.: Seismic electric signals from displacement of charged dislocations, *Tectonophysics*, 224, 149-  
14 152, 1993.
- 15
- 16 Sorokin, V.M. and Pokhotelov, O.A.: Generation of ULF geomagnetic pulsations during early stage of  
17 earthquake preparation. *Journal of Atmospheric and Solar-Terrestrial Physics*, 72, 763–766, 2010.
- 18
- 19 Stavrakas, I., Triantis, D., Agioutantis, Z., Maurigiannakis, S., Saltas, V., Vallianatos, F. and Clarke, M.:  
20 Pressure stimulated currents in rocks and their correlation with mechanical properties, *Nat. Hazards Earth*  
21 *Syst. Sci.* 4 (4) (2004) 563–567, 2004.
- 22 Stein, S. and Wysession, M.: *An introduction to seismology, earthquakes, and earth structure.* Malden, MA:  
23 Blackwell Pub, 2003
- 24
- 25 Stroh, A. N.: *The Formation of Cracks in Plastic Flow II.* Proceedings of the Royal Society of London, Vol.  
26 A232, pp. 548-560. 1955.
- 27
- 28 Sun, S.: *Seismic velocities, anisotropy and elastic properties of crystalline rocks and implications for*  
29 *interpretation of seismic data (PhD thesis, École Polytechnique de Montréal).* Retrieved from  
30 <https://publications.polymtl.ca/725/>, 2011.
- 31
- 32 Surkov, V.V., Molchanov, O.A. and Hayakawa, M.: Pre-earthquake ULF electromagnetic perturbations as  
33 a result of inductive seismomagnetic phenomena during microfracturing. *Journal of Atmospheric and Solar-*  
34 *Terrestrial Physics* 65 (2003) 31–46, 2003.
- 35
- 36 Thomas, J.N., Love, J.J., Johnston, M.J.S.: On the reported magnetic precursor of the 1989 Loma Prieta  
37 earthquake. *Physics of the Earth and Planetary Interiors* 173 (2009) 207–215, 2009.
- 38
- 39 Tilmann, F., Zhang, Y., Moreno, M., Saul, J., Eckelmann, F., Palo, M., Deng, Z., Babeyko, A., Chen, K.,  
40 Baez, J.C., Schurr, B., Wang, R. and Dahm, T.: The 2015 Illapel earthquake, central Chile: A type case for  
41 a characteristic earthquake?, *Geophys. Res. Lett.*, 43, 574–583, doi:10.1002/2015GL066963, 2016.
- 42
- 43 Triantis, D., Vallianatos, F., Stavrakas, I. and Hloupis, G.: Relaxation phenomena of electrical signal  
44 emissions from rock following application of abrupt mechanical stress. *Annals of Geophysics*, 55, 1,  
45 doi:10.4401/ag-5316, 2012.
- 46
- 47 Tuck, B.T., Stacey, F.D. and Starkey, J.: A search for the piezoelectric effect in quartz-bearing rock.  
48 *Tectonophysics*, 39, 7–11, 1977.
- 49

- 1 Turcotte, D. L.: *Fractals and Chaos in Geology and Geophysics*, Cambridge University Press, Second  
2 edition, 397 p., 1997.
- 3
- 4 Turcotte, D.L., Newman, W.I. and Shcherbakov, R.: Micro and macroscopic models of rock fracture.  
5 *Geophys. J. Int.* 152, 718–728, 2003.
- 6
- 7 Tzani A. and Vallianatos F.: A physical model of electrical earthquake precursors due to crack propagation  
8 and the motion of charged edge dislocations, in: *Seismo Electromagnetics (Lithosphere–Atmosphere–*  
9 *Ionosphere–Coupling)*, TerraPub, 2002, pp. 117–130, 2002.
- 10
- 11 Utada, H., Shimizu, H., Ogawa, T., Maeda, T., Furumura, T., Yamamoto, T., Yamazaki, N., Yoshitake, Y.  
12 and Nagamachi, S.: Geomagnetic field changes in response to the 2011 off the Pacific Coast of Tohoku  
13 earthquake and tsunami, *Earth Planet. Sci. Lett.*, 311, 11–27, doi:10.1016/j.epsl.2011.09.036, 2011.
- 14
- 15 Uritsky, V., Smirnova, N., Troyan, V. and Vallianatos, F.: Critical dynamics of fractal fault systems and its  
16 role in the generation of pre-seismic electromagnetic emissions. *Physics and Chemistry of the Earth* 29  
17 (2004) 473–480, 2004.
- 18
- 19 **Vallianatos**, F. and Tzani, A.: Electric Current Generation Associated with the Deformation Rate of a Solid:  
20 Preseismic and Coseismic Signals. *Phys. Chem.Earth*, Vol. 23, No. 9-10, pp. 933-938, 1998.
- 21
- 22 Vallianatos, F. and Tzani, A.: On the nature, scaling and spectral properties of pre-seismic ULF signals.  
23 *Natural Hazards and Earth System Sciences*, 3: 237–242, European Geosciences Union, 2003.
- 24
- 25 Vallianatos, F. and Triantis, D.: Scaling in Pressure Stimulated Currents related with rock fracture. *Physica*  
26 *A* 387 (2008) 4940–4946. Doi:10.1016/j.physa.2008.03.028, 2008.
- 27
- 28 Varotsos, P., Sarlis, N. and Skordas, E.S.: *Natural Time Analysis: The New View of Time*. Springer, Berlin,  
29 2011.
- 30
- 31 Vigny, C., Socquet, A., Peyrat, S., Ruegg, J.-C., Metois, M., Madariaga, R., Morvan, S., Lancieri, M.,  
32 Lacassin, R., Campos, J., Carrizo, D., Bejar-Pizarro, M., Barrientos, S., Armijo, R., Aranda, C., Valderas-  
33 Bermejo, M.-C., Ortega, I., Bondoux, F., Baize, S., Lyon-Caen, H., Pavez, A., Vilotte, J.P., Bevis, M.,  
34 Brooks, B., Smalley, R., Parra, H., Baez, J.-C., Blanco, M., Cimbaro, S. and Kendrick, E.: The 2010 Mw 8.8  
35 Maule Megathrust Earthquake of Central Chile, monitored by GPS. *Science* 332, 1417–1421, 2011.
- 36
- 37 Villante, U., De Lauretis, M., De Paulis, C., Francia, P., Piancatelli, A., Pietropaolo, E., Vellante, M.,  
38 Meloni, A., Palangio, P., Schwingenschuh, K., Prattes, G., Magnes, W. and Nenovski, P.: The 6 April 2009  
39 earthquake at L’Aquila: a preliminary analysis of magnetic field measurements. *Nat. Hazards Earth Syst.*  
40 *Sci.*, 10, 203–214, 2010.
- 41
- 42 Wallace, M.H. and Wallace, T.C.: The paradox of the Loma Prieta Earthquake: Why did rupture terminate  
43 at depth? *Journal of Geophysical Research*, Vol. 98, No. B11, P 19,859-19,867, November 10, 1993.
- 44
- 45 Walters, R.J., Elliott, J. R., D’Agostino, N., England, P. C., Hunstad, I., Jackson, J. A., Parsons, B., Phillips,  
46 R. J. and Roberts, G.: The 2009 L’Aquila earthquake (central Italy): A source mechanism and implications  
47 for seismic hazard. *Geophysical Research Letters*, Vol. 36, L17312, doi:10.1029/2009GL039337, 2009.
- 48
- 49 Wang, Z., Li, J., Zhang, W., Qiao, J. and Wang, B.: The Self-Organized Critical Behavior in Pd-based Bulk



1 Metallic Glass. *Metals* 2015, 5, 1188-1196; doi: 10.3390/met5031188, 2015.  
2  
3 Whitworth, R.W.: Charged dislocations in ionic crystals, *Advances in Physics*, 24, 203-304, 1975.  
4  
5 Xie, H. and Sanderson, D.J.: Fractal kinematics of crack propagation in geomaterials. *Engineering Fracture*  
6 *Mechanics*, Vol. 50, No.4, pp 529-536, 1995.  
7  
8 Yin, D., Chen, S., Liu, X. and Ma, H.: Simulation Study on Strength and Failure Characteristics for Granite  
9 with a Set of Cross-Joints of Different Lengths. *Advances in Civil Engineering*. Volume 2018, Article ID  
10 2384579, 10 pages. <https://doi.org/10.1155/2018/2384579>, 2018.  
11  
12 Yoshida, S., Oswald, C.C. and Sammonds, P.R.: Electric potential changes prior to shear fracture in dry and  
13 saturated rocks. *Geophys. Res. Lett.* 25 (10), 1557–1580, 1998.  
14  
15 Yue, H., Lay, T., Rivera, L., An, C., Vigny, C., Tong, X. and Báez Soto, J.C.: Localized fault slip to the  
16 trench in the 2010 Maule, Chile Mw = 8.8 earthquake from joint inversion of high-rate GPS, teleseismic  
17 body waves, InSAR, campaign GPS, and tsunami observations, *J. Geophys. Res. Solid Earth*, 119, 7786–  
18 7804, doi:10.1002/2014JB011340, 2014.  
19  
20  
21  
22  
23  
24  
25  
26  
27  
28  
29  
30  
31  
32  
33  
34  
35  
36  
37  
38  
39  
40  
41  
42  
43  
44  
45  
46  
47  
48  
49

## Caption Tables

Table 1: Earthquake data from Tohoku 2009 (USGS), Maule 2010 (Vigny et al., 2011; Yue et al., 2014), Sumatra 2004 (Menke et al., 2006), Illapel 2015 (Tilman et al., 2016; Shrivastava et al., 2016), Parkfield 2004 (Kim and Dreger, 2008; Barbot et al., 2009) and Loma Prieta 1989 (Berkeley Seismology Lab; Wallace and Wallace, 1993).

Table 2: Typical values and inputs to Equations 3 and 16.

## Captions Figure

Figure 1: Schematic description of the generation of microcracks and currents due to mechanical stresses on rocks. a) A moving edge dislocation meets a barrier or obstacle. b) A set of edges dislocations are piled up generating a microcracks (blue triangle). The microcracks generate the breaking of ionic bonds, which allows polarization of the microcracks. c) Microcracks can propagate through different paths (blue lines). d) An avalanche of microcracks can cause larger scale cracks.

Figure 2: Outline of the experiments carried out with rocks during compressive modes. a) The change of effort  $\sigma$  generates one failure of the rock at an angle  $2\theta$ . The black arrows indicate the relative slip within the rock. b) Electrification of the rock in microcracks zones close to the fault. The yellow arrows indicate the direction of the generated currents.

Figure 3: Schematic magnetic field measured in an interface due to a polarized sphere of volume  $V$  embedded in a medium with magnetic permeability  $\mu_m$ .

Figure 4: Upper: Temporal evolution of the magnetic field in the form of a critical system (De Santis et al., 2017, Marchetti and Akhoondzadeh, 2018). Lower: Temporal evolution of b-value prior to an earthquake. The vertical line indicates when an earthquake occurs according to De Santis et al. (2017).

Figure 5: Expected co-seismic magnetic field as a function of distance for the Tohoku 2011, Maule 2010, Sumatra 2004, Illapel 2015 earthquakes and Parkfield 2004 (see Table 1 for earthquakes information).

Figure 6: Total Magnetic Field Intensity at the Earth's surface using parameters of Table 2 and  $l_{max} \approx 300$  m in Equation 3 and 16. The domain is  $[-1000, 1000] \times [-1000, 1000] \times [-20, 0] \text{ km}^3$ . Values greater than 0.2 nT can be observed in OSO station (close to 450 km from future Maule earthquake). The red star show the hypocenter of the future earthquake and the yellow arrow is the direction of the electric current  $J$ .

Figure 7: Total Magnetic Field Intensity at the Earth's surface using the same parameters of Figure 6. However, in this Figure we indicate the places where is possible found magnetic variations of 10 nT (white circle) and 160 nT (magenta circle). These variations have never been recorded.

Figure 8: Total Magnetic Field Intensity at the Earth's surface using parameters of Table 2 and  $l_{max} \approx 30$  m in Equation 3 and 16. The domain is  $[-200, 200] \times [-200, 200] \times [-20, 0] \text{ km}^3$ . Values greater than 0.2 nT can be observed in OSO station. The yellow arrow is the direction of the electric current  $J$ . This size of microcracks could be the one that allows to explain the measurements of magnetic variations of Cordaro et al. (2019b) and Marchetti and Akhoondzadeh (2018).

1  
2

**Table 1**

|                      | Tohoku<br>Mw9.0<br>(Japan) | Maule<br>Mw8.8<br>(Chile) | Sumatra<br>Mw9.3<br>(Indonesia) | Illapel<br>Mw8.3<br>(Chile) | Parkfield<br>Mw6.0<br>(California,<br>USA) | Loma<br>Prieta<br>Mw7.1<br>(California,<br>USA) |
|----------------------|----------------------------|---------------------------|---------------------------------|-----------------------------|--------------------------------------------|-------------------------------------------------|
| Latitude             | 38.322                     | -36.290                   | 3.316                           | -31.573                     | 35.815                                     | 37.040                                          |
| Longitude            | 142.369                    | -73.239                   | 95.854                          | -71.674                     | -120.374                                   | -121.877                                        |
| $\mu$ [Pa]           | $5.7 \times 10^{10}$       | $3.3 \times 10^{10}$      | $7 \times 10^{10}$              | $3.5 \times 10^{10}$        | $3 \times 10^{10}$                         | $3 \times 10^{10}$                              |
| d [m]                | 5.27                       | 4                         | 5                               | 5                           | 0.22                                       | 1.2                                             |
| S [km <sup>2</sup> ] | 625 × 260                  | 450 × 120                 | 1200 × 200                      | 200 × 80                    | 20 × 10                                    | 40 × 10                                         |

3  
4  
5

**Table 2**

| parameter           | Value                       | reference                    |
|---------------------|-----------------------------|------------------------------|
| $\mu_m$ (Granite)   | $13.5 \times 10^{-7} N/A^2$ | Scott, 1983                  |
| $l$                 | $5 \times 10^{-6} A/m^2$    | Tzanis and Vallianatos, 2002 |
| $D$ (Granite)       | 2.6                         | Turcotte, 1997               |
| $\theta$ (Granite)  | 69.93°                      | Yin et al., 2018             |
| $l_{min}$ (Granite) | $10^{-3} m$                 | Shah, 2011                   |
| $l_{max1}$          | 300 m                       | Input                        |
| $l_{max2}$          | 30 m                        | Input                        |
| $h$                 | 15 km                       | Input                        |

6  
7  
8  
9  
10  
11  
12  
13  
14  
15  
16  
17  
18  
19  
20  
21  
22  
23  
24  
25  
26  
27  
28  
29  
30

1

Figure 1

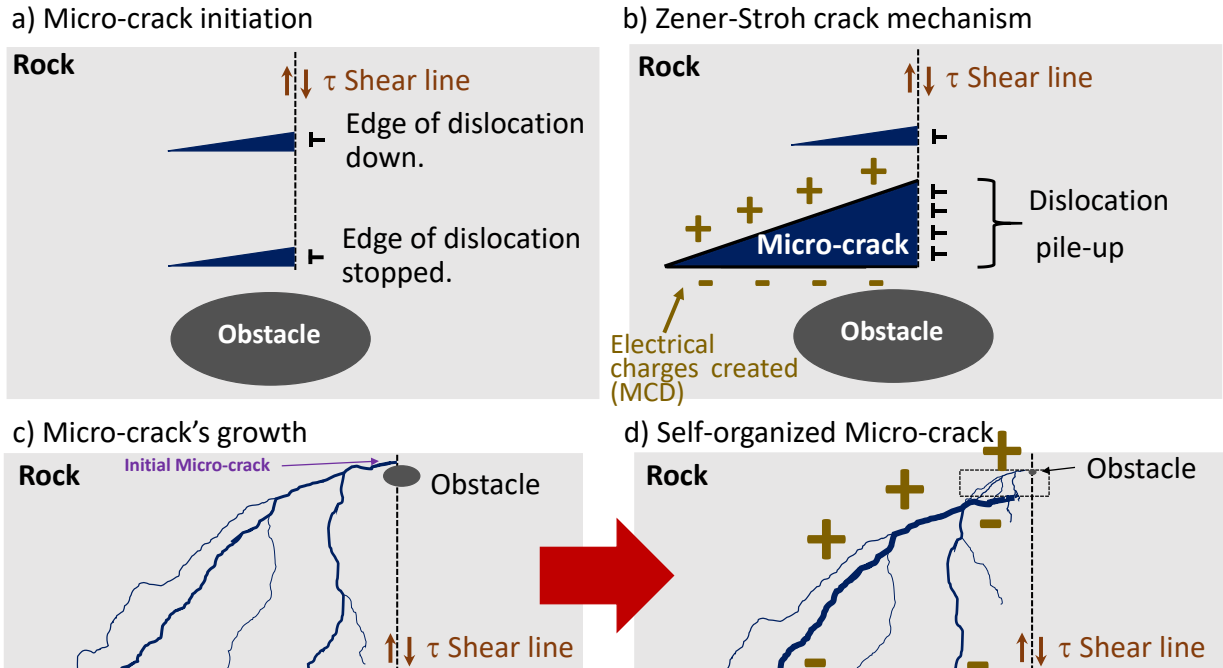

2  
3  
4  
5  
6  
7  
8  
9

Figure 2

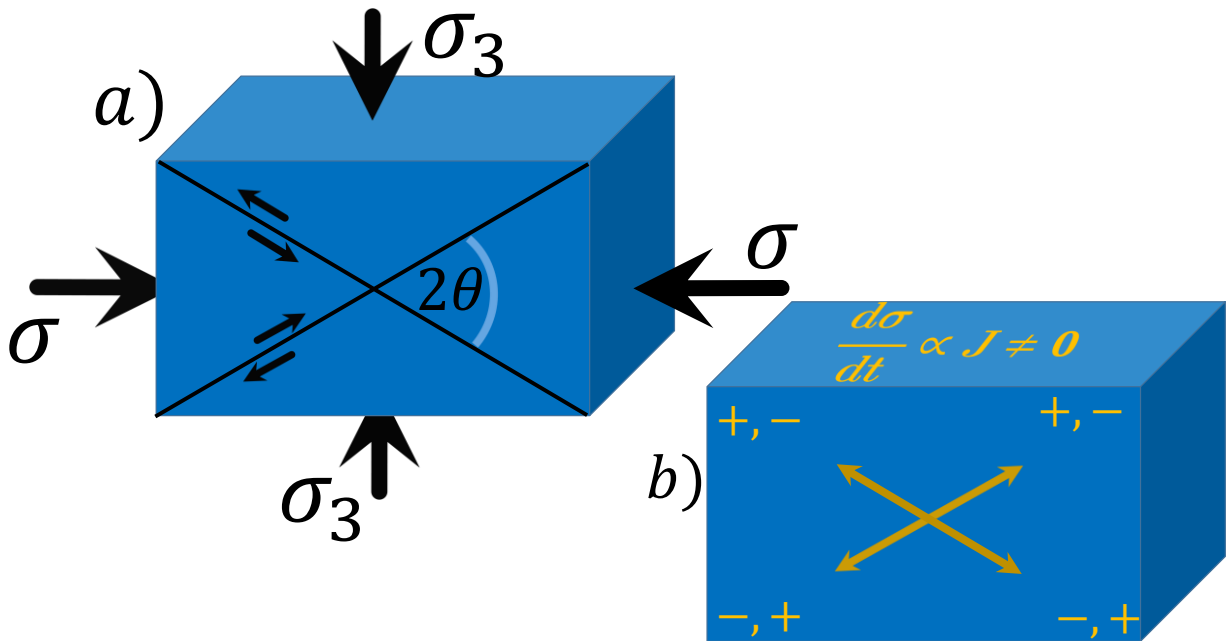

10  
11  
12

1

Figure 3

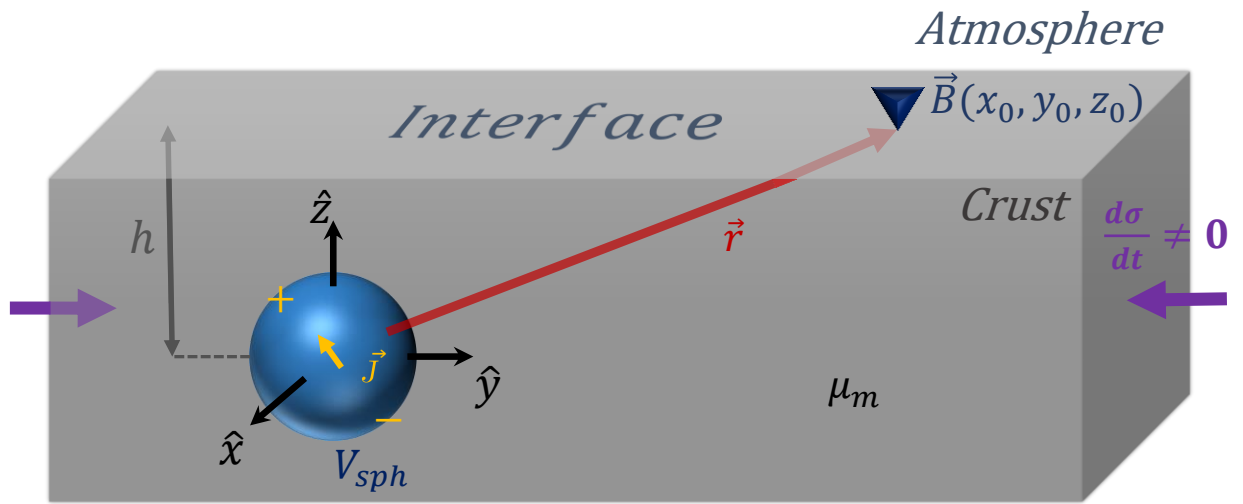

2

Figure 4

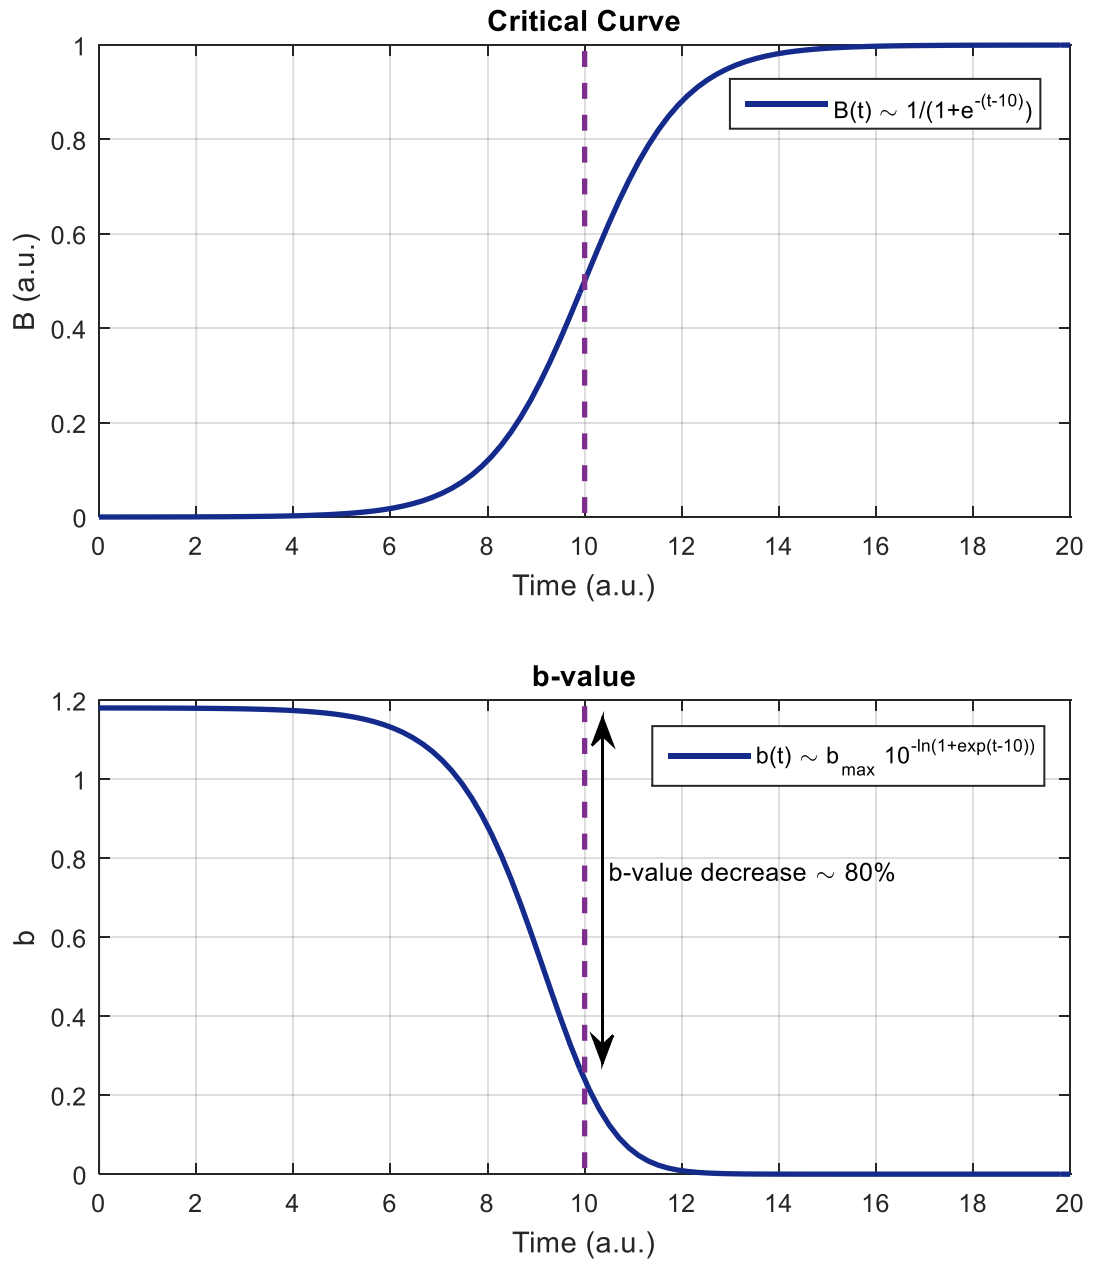

2  
3  
4  
5  
6  
7  
8  
9  
10  
11  
12

1  
2

Figure 5

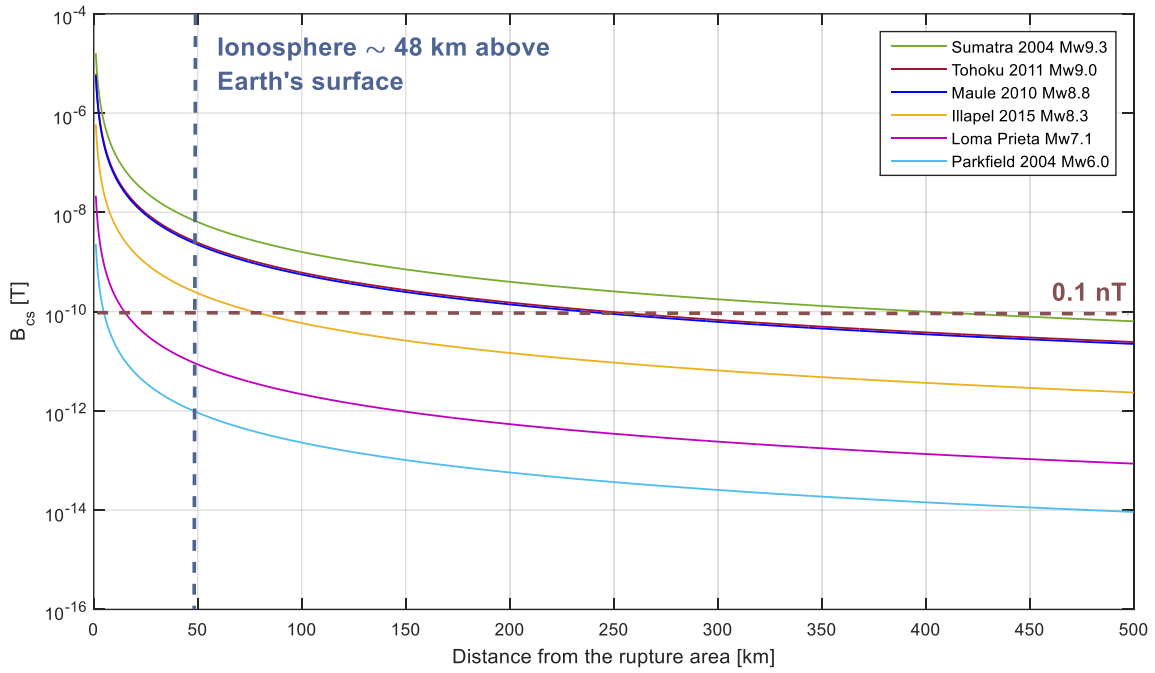

3  
4  
5  
6  
7  
8

Figure 6

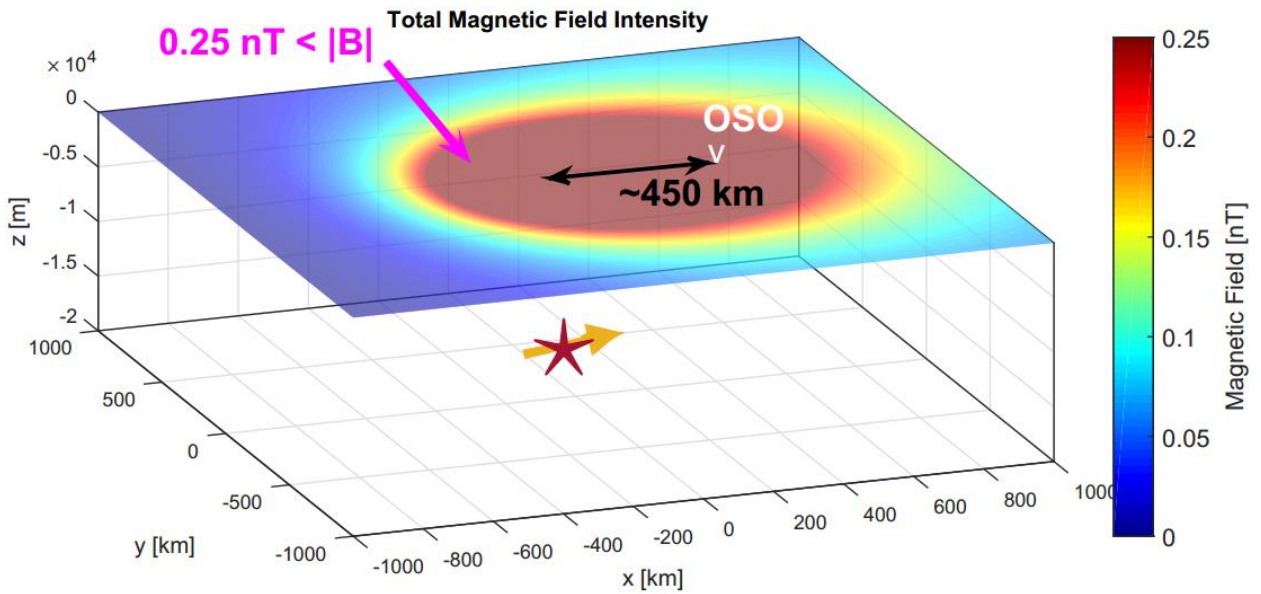

9  
10  
11  
12  
13

1  
2

Figure 7

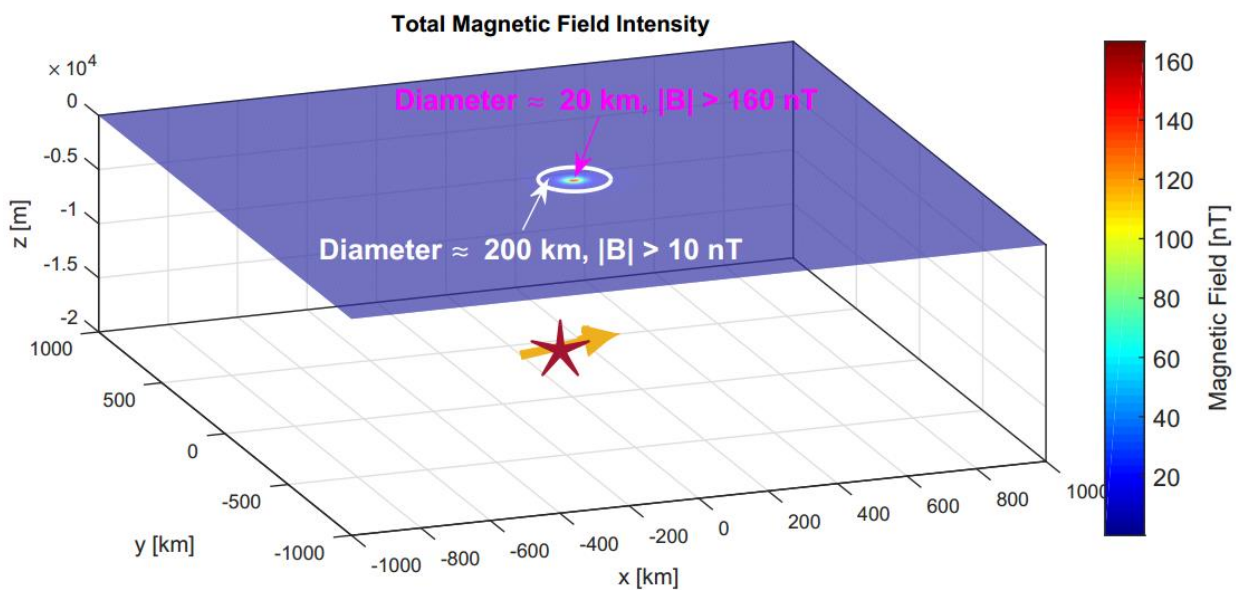

3  
4  
5  
6  
7

Figure 8

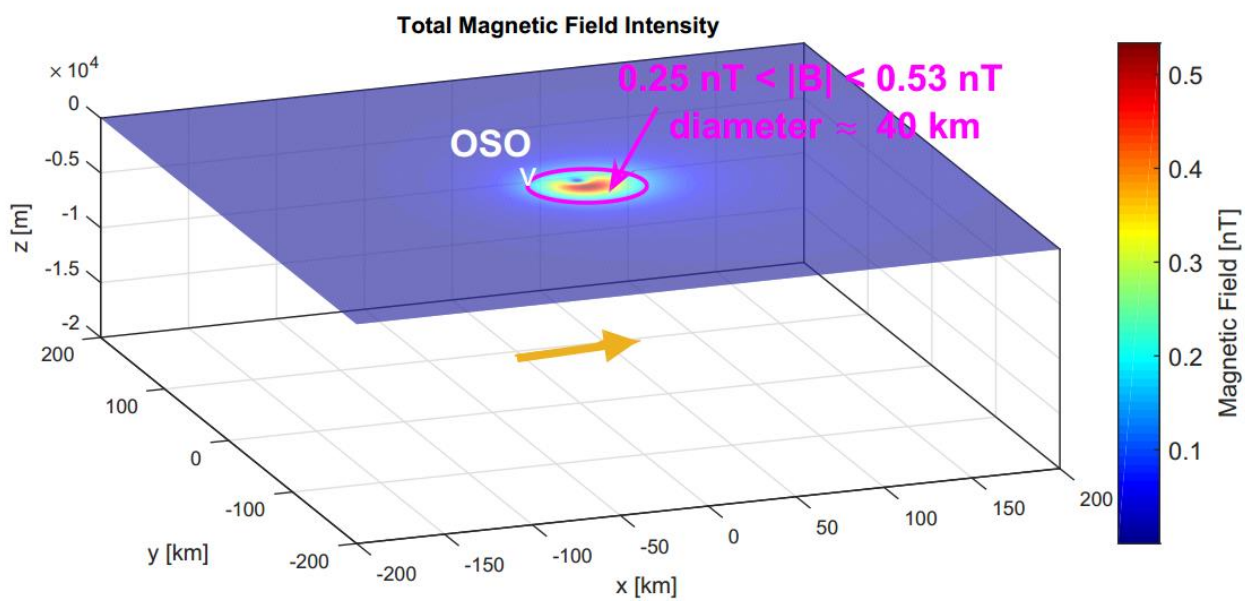

8
